# Supplementary material for: Dion–Jacobson-type oxide-ion conductor CsLa2Ti2NbO10−δ without phase transitions
Source: Royal Society of Chemistry journal article supplement (doi:10.1039/d0ta06135b), 2020-01-01
Supplement: d0ta06135b1.pdf [file d0ta06135b1.pdf]

## Supporting Information

### Dion–Jacobson-type oxide-ion conductor $\text{CsLa}_2\text{Ti}_2\text{NbO}_{10-\delta}$ without phase transitions

Wenrui Zhang,<sup>ab</sup> Kotaro Fujii,<sup>a</sup> Tomohiro Ishiyama,<sup>b</sup> Harue Kandabashi<sup>a</sup> and Masatomo Yashima<sup>a\*</sup>

<sup>a</sup> Department of Chemistry, School of Science, Tokyo Institute of Technology, 2–12–1 W4–17 Ookayama, Meguro-ku, Tokyo 152–8551, Japan

<sup>b</sup> Research Institute for Energy Conservation, National Institute of Advanced Industrial Science and Technology (AIST), AIST Central 5, Higashi 1-1-1, Tsukuba, Ibaraki 305-8565, Japan

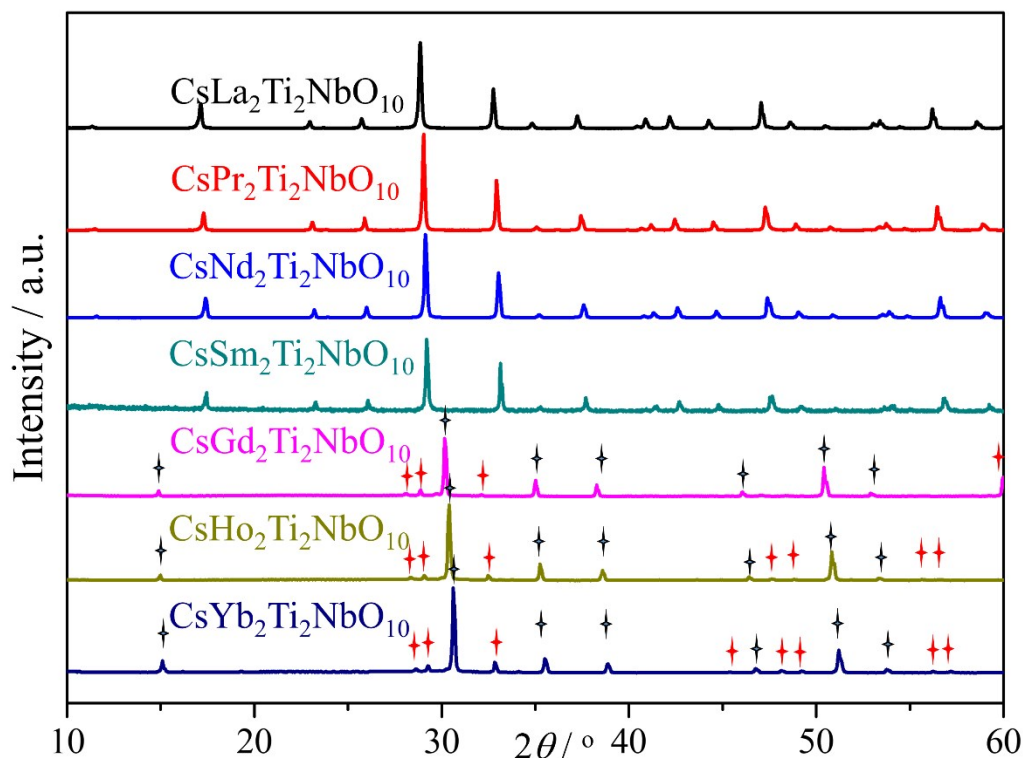

**Fig. S1** X-ray diffraction patterns of  $\text{CsR}_2\text{Ti}_2\text{NbO}_{10}$  ( $R = \text{La, Pr, Nd, Sm, Gd, Ho}$  and  $\text{Yb}$ ). The black star marks in  $\text{CsR}_2\text{Ti}_2\text{NbO}_{10}$  ( $R = \text{Gd, Ho}$  and  $\text{Yb}$ ) denote the X-ray diffraction peaks of  $\text{R}_2\text{Ti}_2\text{O}_7$  ( $R = \text{Gd, Ho}$  and  $\text{Yb}$ ). The red star marks stand for the unknown peaks.

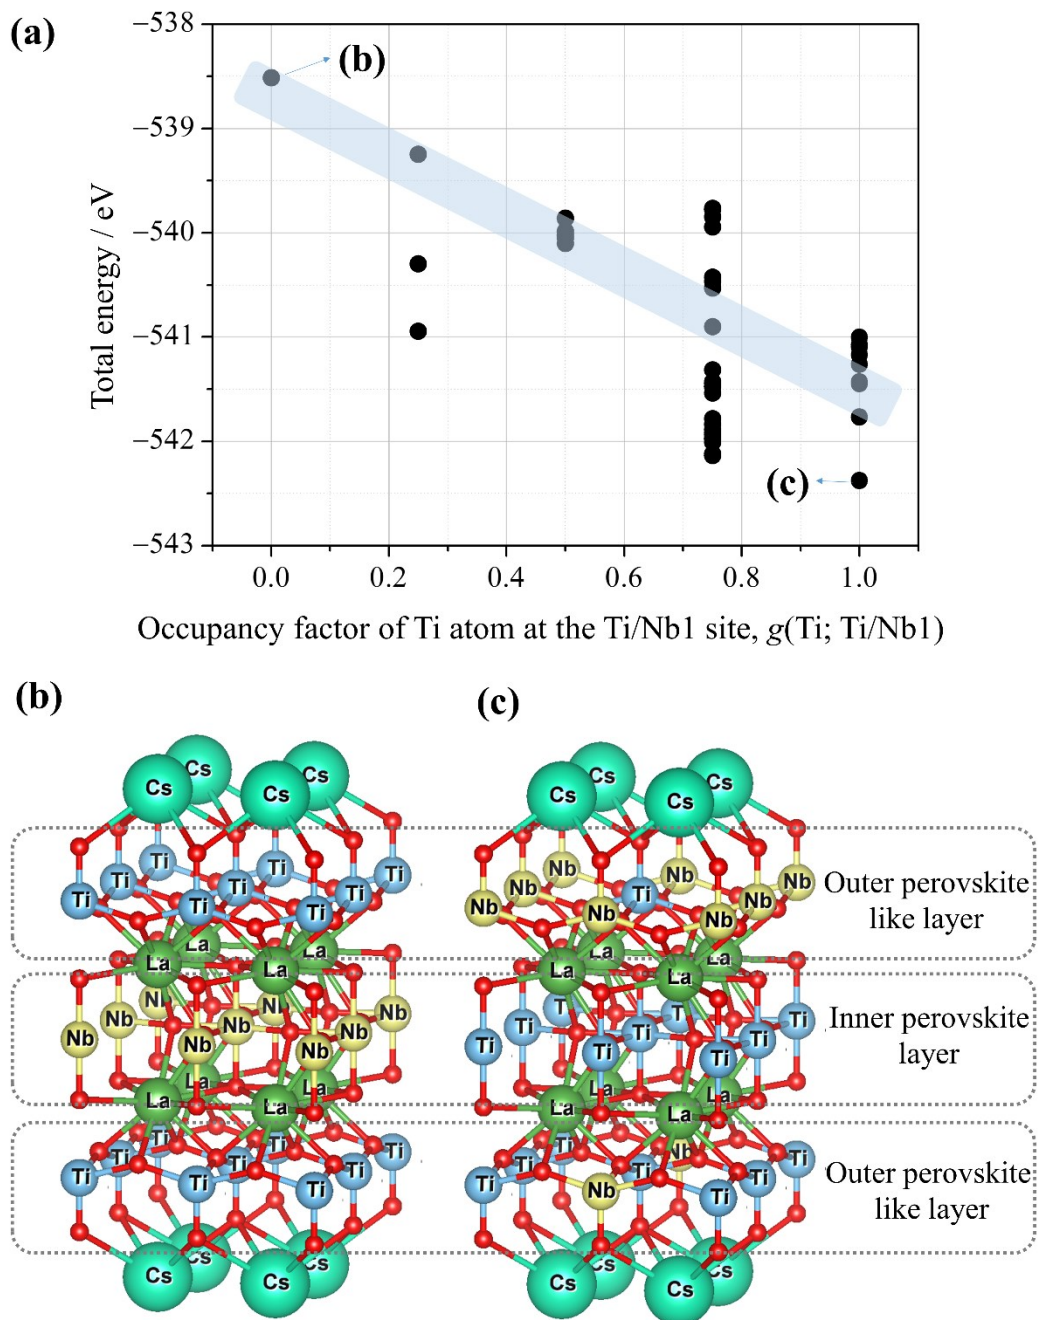

**Fig. S2** (a) Total energies of 49 kinds of models (all the possible arrangements of the Ti and Nb cations in the supercells  $(\text{CsLa}_2\text{Ti}_2\text{NbO}_{10})_4$ ) using DFT-based calculations, (b) the most unstable model and (c) the most stable model of the  $2 \times 2 \times 1$  tetragonal supercells  $(\text{CsLa}_2\text{Ti}_2\text{NbO}_{10})_4$ .

We constructed  $2 \times 2 \times 1$  tetragonal supercells  $(\text{CsLa}_2\text{Ti}_2\text{NbO}_{10})_4$  with different arrangements of the Ti and Nb cations. The Ti and Nb cations were allowed to exist in the inner perovskite layer and also in the outer perovskite layer (**Fig. S2**). **Fig. S2b** shows the most unstable model where all the Nb cations exist in the inner perovskite layer and all the Ti cations are located in the outer perovskite-like layers.

This model is inconsistent with the experimental results. **Fig. S2c** shows the most stable model where only Ti cations exist in the inner perovskite layer and Ti and Nb cations exist in the outer perovskite-like layer, which is consistent with the refined crystal structure with the inner perovskite layer  $\text{LaTi}_{0.985}\text{Nb}_{0.015}\text{O}_3$  and the outer perovskite-like layer  $\text{La}_{0.5}\text{Ti}_{0.508}\text{Nb}_{0.492}\text{O}_3$  (**Fig. 3**).

The different occupation of *B*-site cations (Ti and Nb) in  $\text{CsLa}_2\text{Ti}_2\text{NbO}_{10}$  was explained using the electrostatic stabilization, in addition to the ionic radii and charge differences by Hong in 2000.<sup>[1]</sup> They concluded that the insertion of a CsO layer with negative charge ( $[\text{CsO}]^{-1}$ ) into a 3-dimensional perovskite structure contributes to the ordering of  $\text{Ti}^{4+}$  and  $\text{Nb}^{5+}$  cations along the *z*-axis by electrostatic stabilization. They imagined  $\text{CsLa}_2\text{Ti}_2\text{NbO}_{10}$  as the composite of a  $[\text{CsO}]$  layer and a  $[\text{La}_2\text{Ti}_2\text{NbO}_9]$  layer. Then, the compound was depicted as a chain of  $[\text{CsO}]^{-1}-[\text{La}_{0.5}(\text{Ti}_{1-x}\text{Nb}_x)\text{O}_3]^{x-0.5}-[\text{La}(\text{Ti}_{2x}\text{Nb}_{1-2x})\text{O}_3]^{-2x+2}-[\text{La}_{0.5}(\text{Ti}_{1-x}\text{Nb}_x)\text{O}_3]^{x-0.5}-[\text{CsO}]^{-1}$  depending on the distribution of *B*-site cations. They considered the  $x = 0.5$  gives the charge distribution of  $[\text{CsO}]^{-1}-[\text{La}_{0.5}(\text{Ti}_{0.5}\text{Nb}_{0.5})\text{O}_3]^0-[\text{LaTiO}_3]^{+1}-[\text{La}_{0.5}(\text{Ti}_{0.5}\text{Nb}_{0.5})\text{O}_3]^0-[\text{CsO}]^{-1}$  with the ideal charge separation, which means *B*-site cation arrangement in  $\text{CsLa}_2\text{Ti}_2\text{NbO}_{10}$  was determined by the electrostatic stabilization.

#### References

1. Y.-S. Hong, S.-J. Kim, S.-J. Kim and J.-H. Choy, *J. Mater. Chem.*, 2000, **10**, 1209.

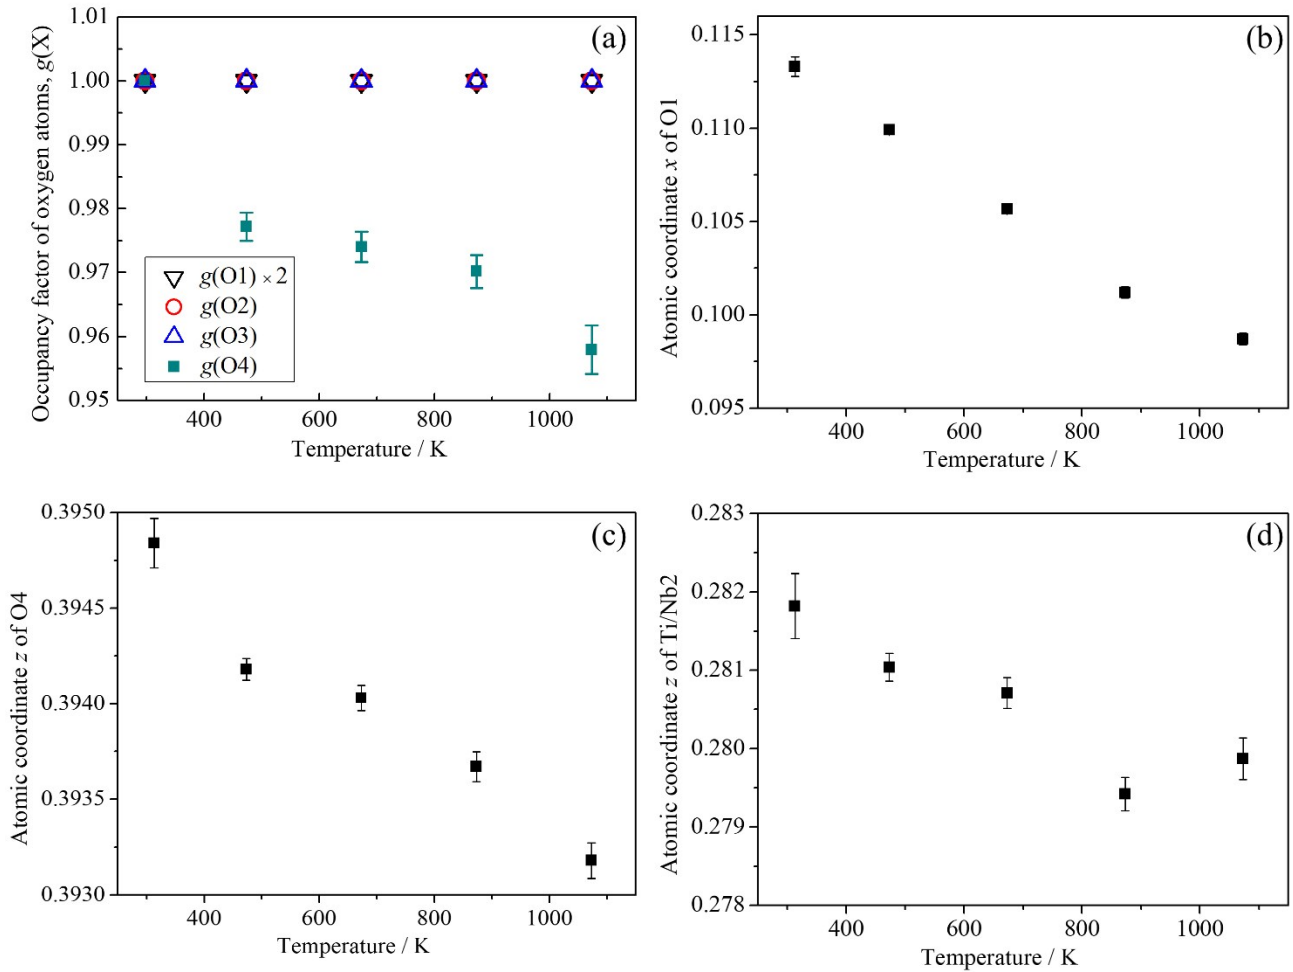

**Fig. S3** Temperature dependencies of (a) the occupancy factors of oxygen atoms at the  $O_i$  site  $g(O_i)$ , (b) the atomic coordinate  $x$  of the oxygen atom at the O1 site,  $x(\text{O1})$ , (c) the atomic coordinate  $z$  of the oxygen atom at the O4 site,  $z(\text{O4})$ , and (d) the atomic coordinate  $z$  of the  $\text{Ti}_{0.5102}\text{Nb}_{0.4898}$  atom at the Ti/Nb2 site,  $z(\text{Ti/Nb2})$ , in  $\text{CsLa}_2\text{Ti}_2\text{NbO}_{10-\delta}$ , which were refined using high-temperature neutron-diffraction data. The equatorial oxygen atom at the O4 site in the CsO layer has a higher oxygen vacancy concentration than the others and the oxygen vacancy concentration increases with an increase of temperature. The atomic coordinates of  $x(\text{O1})$ ,  $z(\text{O4})$  and  $z(\text{Ti/Nb2})$  decrease with an increase of temperature.

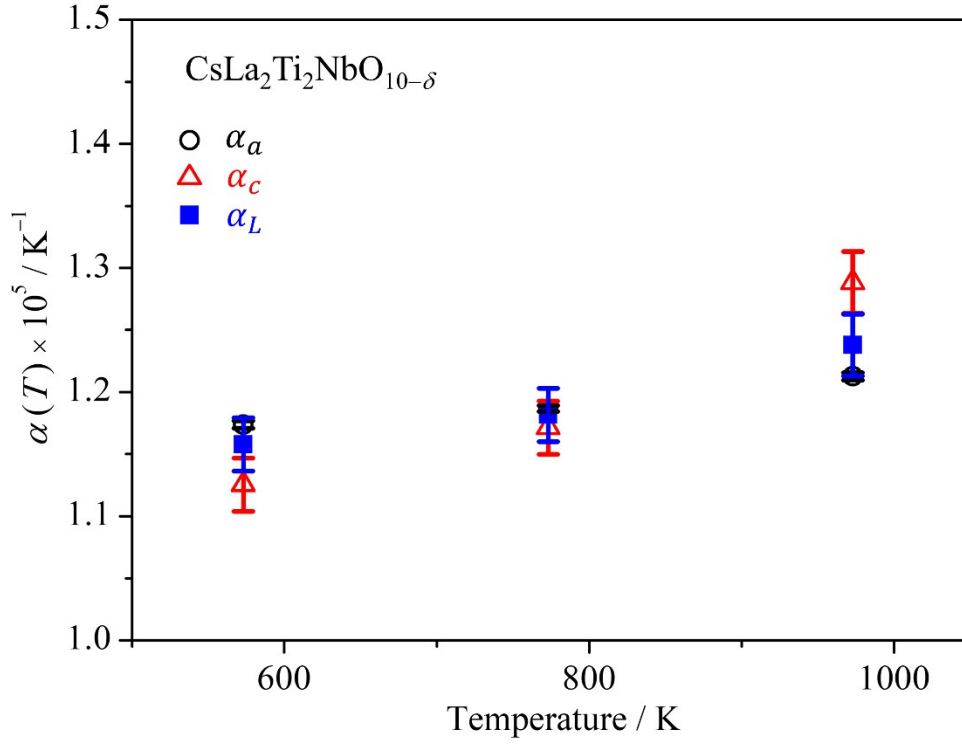

**Fig. S4** Thermal expansion coefficients (TECs) of  $\text{CsLa}_2\text{Ti}_2\text{NbO}_{10-\delta}$ . The TECs were estimated using the lattice parameters refined by the Rietveld analyses of the neutron diffraction data. TECs of  $\text{CsLa}_2\text{Ti}_2\text{NbO}_{10-\delta}$  are defined as follows.

$$\alpha_a\left(\frac{(T_{i+1}) + (T_i)}{2}\right) = (a(T_{i+1}) - a(T_i)) \times 2 / (a(T_{i+1}) + a(T_i)) / (T_{i+1} - T_i)$$

$$\alpha_c\left(\frac{(T_{i+1}) + (T_i)}{2}\right) = (c(T_{i+1}) - c(T_i)) \times 2 / (c(T_{i+1}) + c(T_i)) / (T_{i+1} - T_i)$$

$$\alpha_L\left(\frac{(T_{i+1}) + (T_i)}{2}\right) = (v(T_{i+1}) - v(T_i)) \times 2 / (v(T_{i+1}) + v(T_i)) / (T_{i+1} - T_i)$$

$$\text{where } v(T_i) = [a(T_i) \cdot b(T_i) \cdot c(T_i)]^{1/3}$$

Here, the  $i$  is 1, 2 and 3;  $T_1 = 473$  K,  $T_2 = 673$  K,  $T_3 = 873$  K and  $T_4 = 1073$  K for  $\text{CsLa}_2\text{Ti}_2\text{NbO}_{10-\delta}$ . The  $\alpha_a$ ,  $\alpha_c$  and  $\alpha_L$  increase with an increase of temperature.

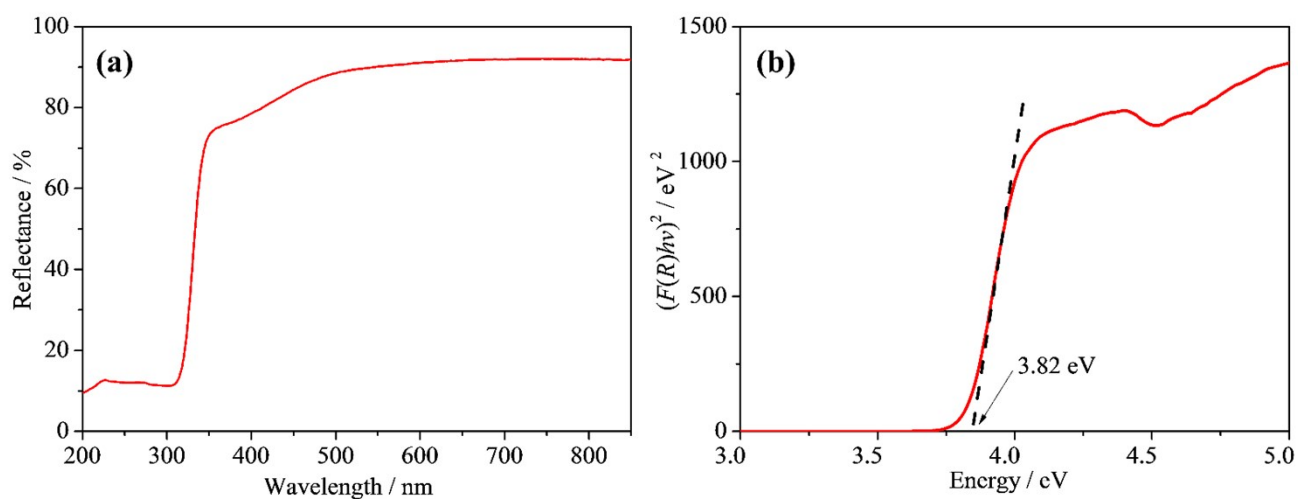

**Fig. S5** (a) Diffuse reflectance spectrum and (b) Tauc plot for the direct band gap of CsLa<sub>2</sub>Ti<sub>2</sub>NbO<sub>10</sub>.

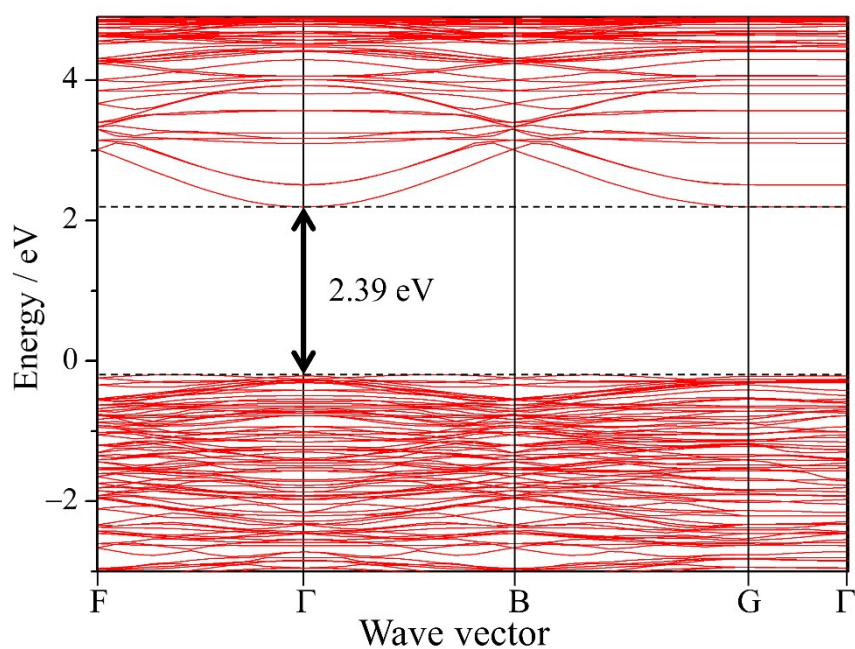

**Fig. S6** Band structure of CsLa<sub>2</sub>Ti<sub>2</sub>NbO<sub>10</sub> based on DFT calculations using the most stable model in Fig. S2, which indicates the direct band gap at the  $\Gamma$  point. Lower  $E_g$  value (2.39 eV) in the DFT calculations compared with the experimental value (3.82 eV) is usual.

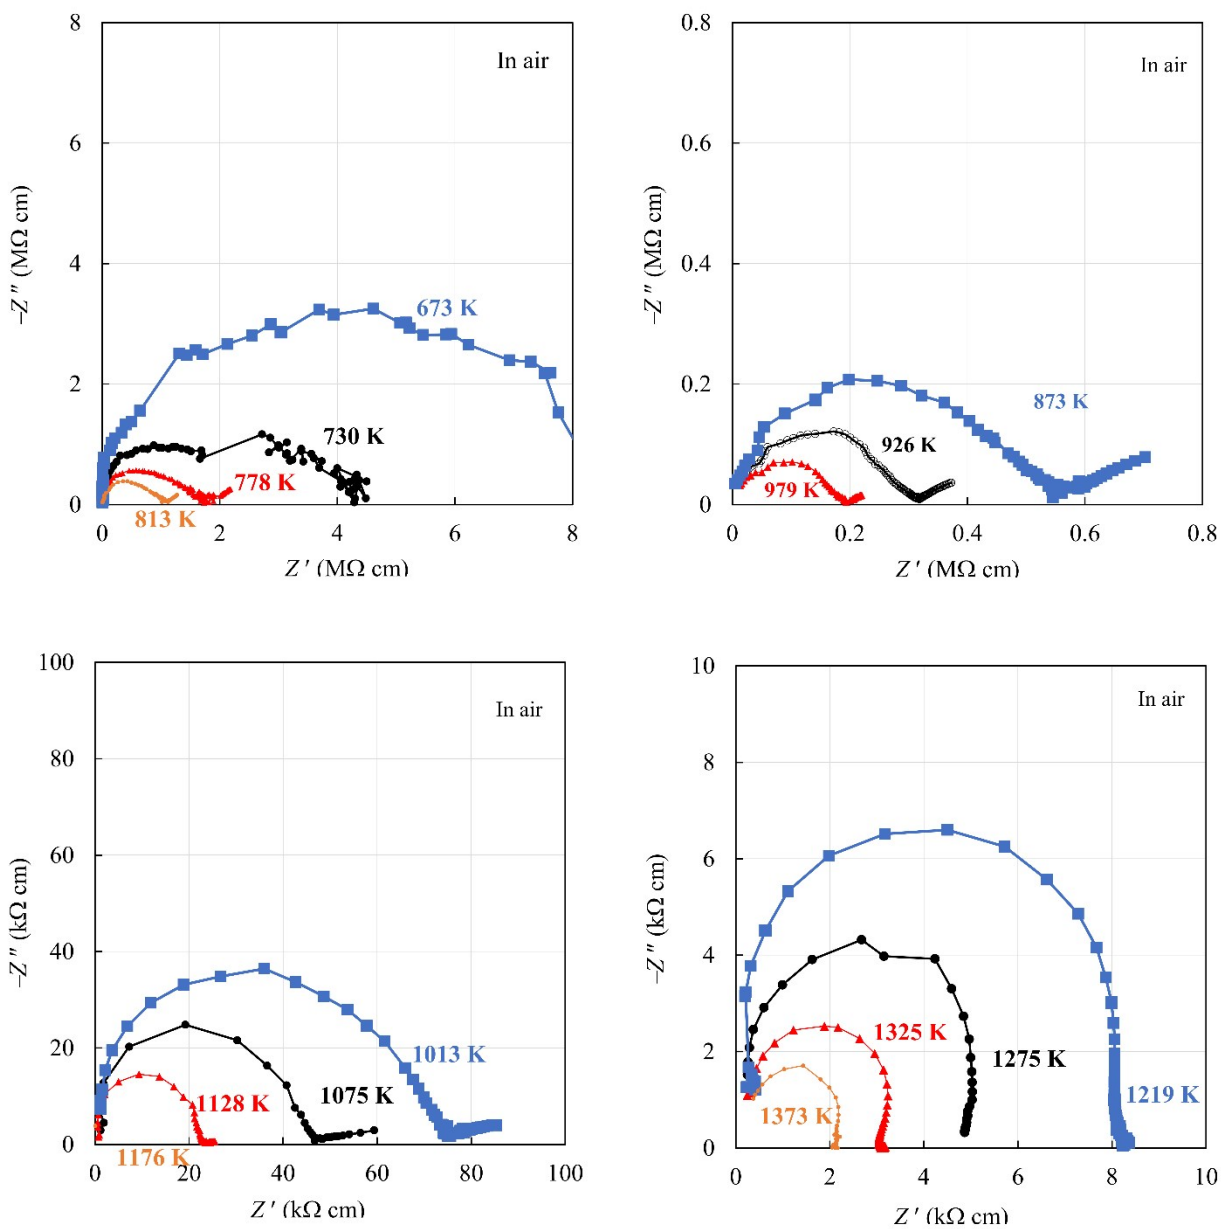

Fig. S7 Complex impedance plot recorded from 673 K to 1373K in following dry air.

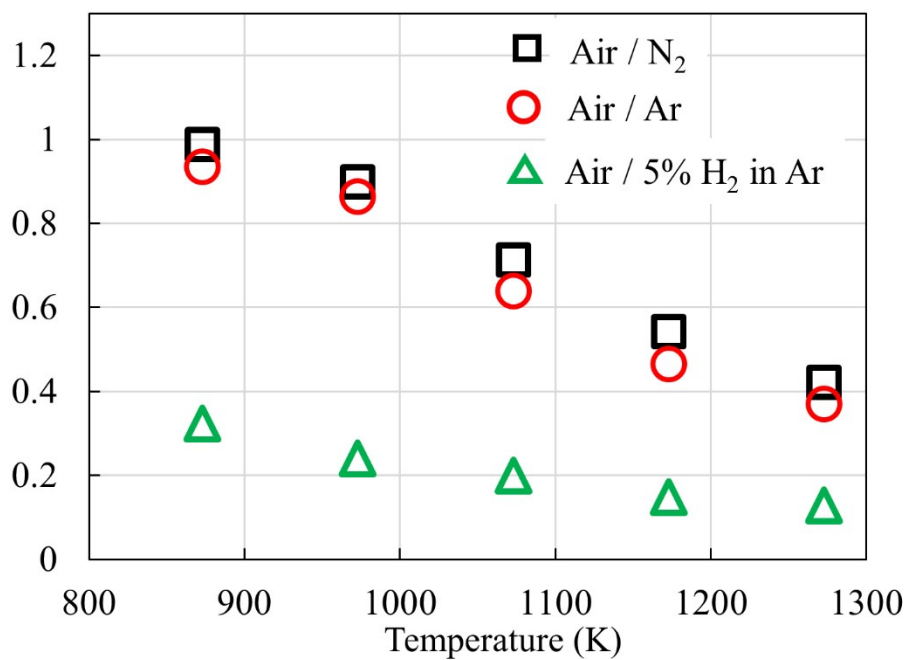

**Fig. S8** Oxide-ion transport number of CsLa<sub>2</sub>Ti<sub>2</sub>NbO<sub>10- $\delta$</sub>  over the temperature range 873–1273 K measured by the oxygen concentration cell method.

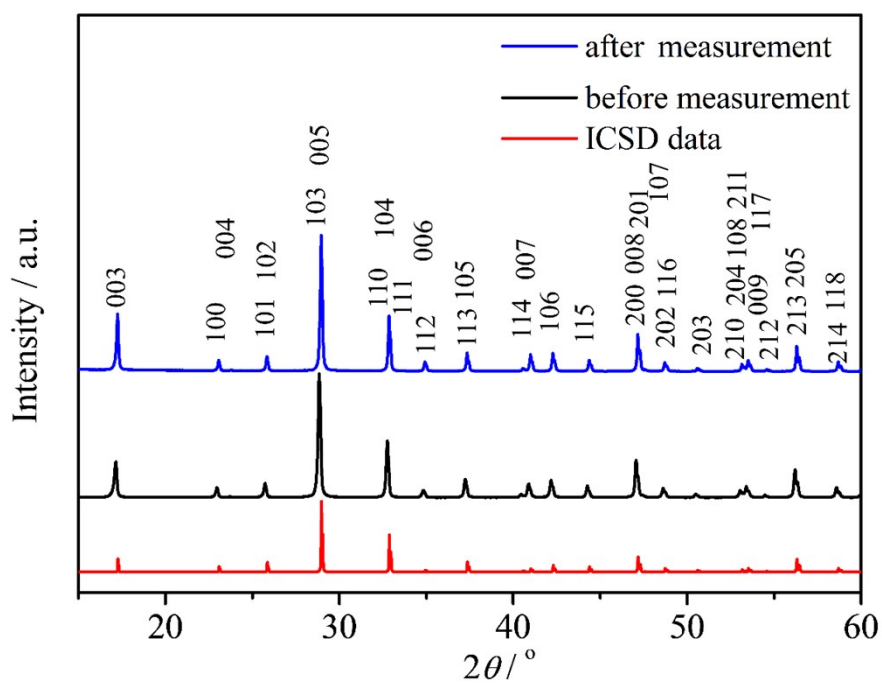

**Fig. S9** X-ray powder diffraction patterns of CsLn<sub>2</sub>Ti<sub>2</sub>NbO<sub>10- $\delta$</sub>  before and after the electrical-conductivity measurements at different oxygen partial pressures.



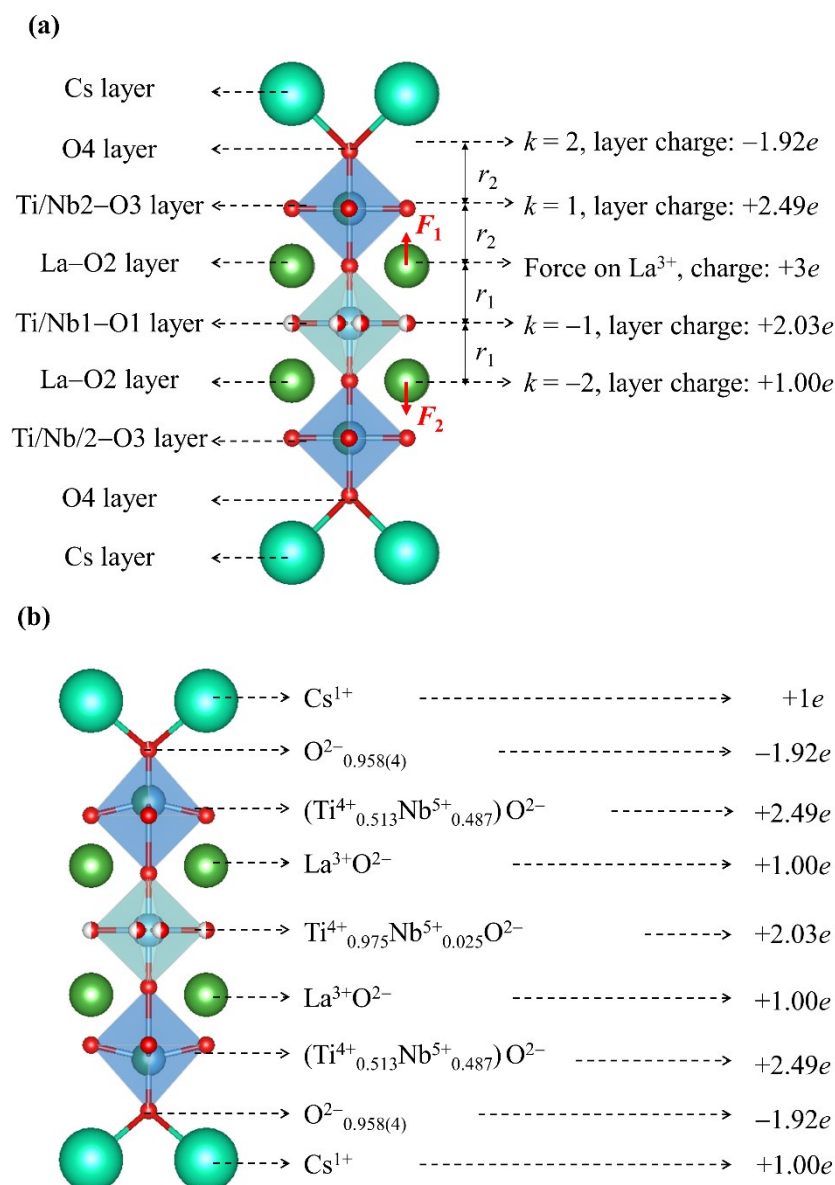

**Fig. S10**  $\text{La}^{3+}$  displacement from the La-O2 layer due to electrostatic forces. (a) Hypothetical crystal structure of  $\text{CsLa}_2\text{Ti}_2\text{NbO}_{9.916(8)}$  without cation and anion displacements. (b) Refined crystal structure of  $\text{CsLa}_2\text{Ti}_2\text{NbO}_{9.916(8)}$ , which was obtained using neutron-diffraction data at 1073 K.

The  $r_1$  stands for the distance between  $\text{La}^{3+}$  and Ti/Nb1-O1 layer, while the  $r_2$  denotes the distance between  $\text{La}^{3+}$  and Ti/Nb2-O3 layer. The interatomic distance  $r_2$  is assumed to be  $r_1$ .  $F_1$  and  $F_2$  in (a) are the electrostatic forces on the  $\text{La}^{3+}$  cations. To estimate the  $F_1$  and  $F_2$ , the Coulomb's forces between the  $\text{La}^{3+}$  cation and four layers of  $k = \pm 2$  and  $\pm 1$  are considered. The calculated results show  $F_1 > 0$  and  $F_2 < 0$ , indicating that the  $\text{La}^{3+}$  cations in  $\text{CsLa}_2\text{Ti}_2\text{NbO}_{9.916(8)}$  can be displaced apart from the Ti/Nb1-O1 layer due to the electrostatic forces.

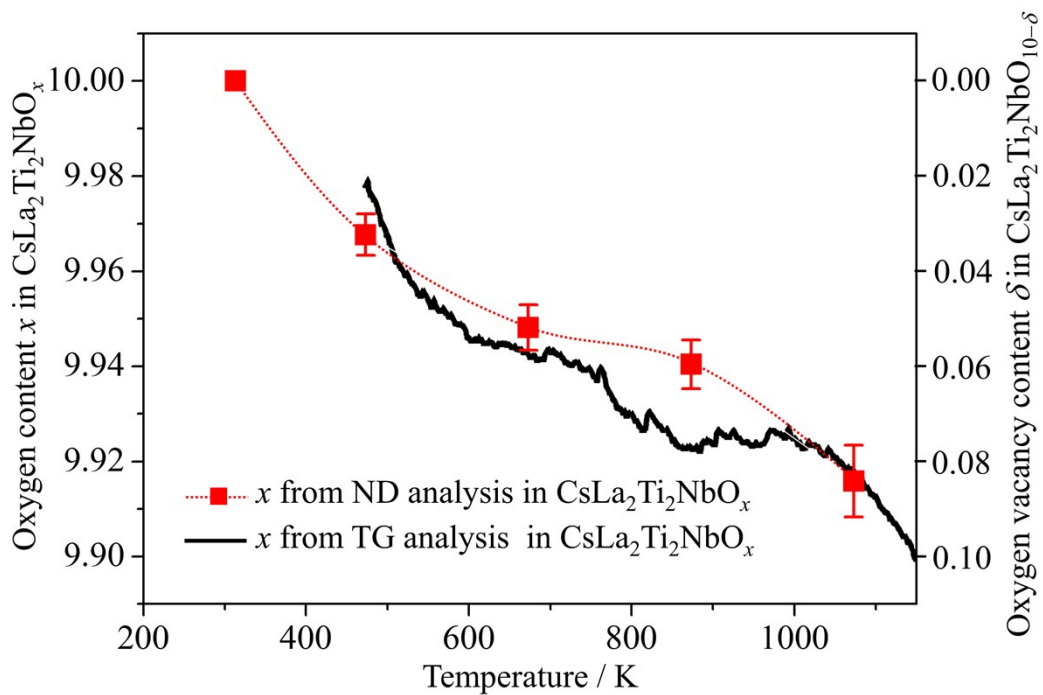

**Fig.S11** Oxygen contents  $x$  in  $\text{CsLa}_2\text{Ti}_2\text{NbO}_x$  and oxygen vacancy content  $\delta$  in  $\text{CsLa}_2\text{Ti}_2\text{NbO}_{10-\delta}$ , which were obtained through a thermogravimetric analysis and calculated using occupancy factors refined using the ND data.

**Table S1.** Lattice parameters  $a$ ,  $c$  and volume  $V$  of  $\text{CsR}_2\text{Ti}_2\text{NbO}_{10-\delta}$  ( $R = \text{La, Pr, Nd}$  and  $\text{Sm}$ ) which were refined by the Rietveld analysis using the XRPD data.

| Composition                                      | $a$           | $c$           | $V$          |
|--------------------------------------------------|---------------|---------------|--------------|
| $\text{CsLa}_2\text{Ti}_2\text{NbO}_{10-\delta}$ | 3.84951(2) Å  | 15.3964(11) Å | 228.1551(11) |
| $\text{CsPr}_2\text{Ti}_2\text{NbO}_{10-\delta}$ | 3.83714(12) Å | 15.3099(8) Å  | 225.4175(8)  |
| $\text{CsNd}_2\text{Ti}_2\text{NbO}_{10-\delta}$ | 3.83292(3) Å  | 15.2874(2) Å  | 224.5914(2)  |
| $\text{CsSm}_2\text{Ti}_2\text{NbO}_{10-\delta}$ | 3.8178(2) Å   | 15.2544(12) Å | 222.3420(12) |

**Table S2.** Crystallographic parameters of CsLa<sub>2</sub>Ti<sub>2</sub>NbO<sub>9.954(4)</sub> which were refined using neutron-diffraction data at 473 K.

| Site <i>s</i> | Atom <i>X</i> ,<br>Oxidation number                                                          | Wyckoff<br>position                     | $g(X; s)^a$                             | <i>x</i>                                | <i>y</i>                                | <i>z</i>                                |                                         |
|---------------|----------------------------------------------------------------------------------------------|-----------------------------------------|-----------------------------------------|-----------------------------------------|-----------------------------------------|-----------------------------------------|-----------------------------------------|
| Cs            | Cs +1                                                                                        | 1 <i>d</i>                              | 1                                       | 1/2                                     | 1/2                                     | 1/2                                     |                                         |
| La            | La +3                                                                                        | 2 <i>h</i>                              | 1                                       | 1/2                                     | 1/2                                     | 0.14035(4)                              |                                         |
| Ti/Nb1        | Ti                                                                                           | 1 <i>a</i>                              | 0.9855(11)                              | 0                                       | 0                                       | 0                                       |                                         |
|               | Nb                                                                                           |                                         | 0.0145(11)                              |                                         |                                         |                                         |                                         |
| Ti/Nb2        | Ti                                                                                           | 2 <i>g</i>                              | 0.5072(5)                               | 0                                       | 0                                       | 0.28106(2)                              |                                         |
|               | Nb                                                                                           |                                         | 0.4928(5)                               |                                         |                                         |                                         |                                         |
| O1            | O -2                                                                                         | 4 <i>n</i>                              | 0.5                                     | 0.1099(2)                               | 1/2                                     | 0                                       |                                         |
| O2            | O -2                                                                                         | 2 <i>g</i>                              | 1                                       | 0                                       | 0                                       | 0.12432(5)                              |                                         |
| O3            | O -2                                                                                         | 4 <i>i</i>                              | 1                                       | 0                                       | 1/2                                     | 0.24963(4)                              |                                         |
| O4            | O -2                                                                                         | 2 <i>g</i>                              | 0.977(2)                                | 0                                       | 0                                       | 0.39421(6)                              |                                         |
| Site <i>s</i> | $U_{\text{iso}}^b$ or $U_{\text{eq}}^c$ (Å <sup>2</sup> )                                    | $U_{11}$ (Å <sup>2</sup> ) <sup>d</sup> | $U_{22}$ (Å <sup>2</sup> ) <sup>d</sup> | $U_{33}$ (Å <sup>2</sup> ) <sup>d</sup> | $U_{12}$ (Å <sup>2</sup> ) <sup>d</sup> | $U_{13}$ (Å <sup>2</sup> ) <sup>d</sup> | $U_{23}$ (Å <sup>2</sup> ) <sup>d</sup> |
| Cs            | $U_{\text{eq}} = 0.0190(4)$                                                                  | 0.0083(5)                               | 0.0083(5)                               | 0.0403(12)                              | 0                                       | 0                                       | 0                                       |
| La            | $U_{\text{iso}} = 0.0043(14)$                                                                | -                                       | -                                       | -                                       | -                                       | -                                       | -                                       |
| Ti/Nb1        | $U_{\text{iso}} = 0.0039(10)$                                                                | -                                       | -                                       | -                                       | -                                       | -                                       | -                                       |
| Ti/Nb2        | $= U_{\text{iso}}(\text{Ti}; \text{Ti/Nb1})$<br>$= U_{\text{iso}}(\text{Nb}; \text{Ti/Nb1})$ | -                                       | -                                       | -                                       | -                                       | -                                       | -                                       |
| O1            | $U_{\text{iso}} = 0.0161(4)$                                                                 | -                                       | -                                       | -                                       | -                                       | -                                       | -                                       |
| O2            | $U_{\text{eq}} = 0.0188(3)$                                                                  | 0.0119(4)                               | 0.0119(4)                               | 0.0326(11)                              | 0                                       | 0                                       | 0                                       |
| O3            | $U_{\text{iso}} = 0.0075(11)$                                                                | -                                       | -                                       | -                                       | -                                       | -                                       | -                                       |
| O4            | $U_{\text{eq}} = 0.0077(3)$                                                                  | 0.0088(5)                               | 0.0088(5)                               | 0.0055(6)                               | 0                                       | 0                                       | 0                                       |

Crystal system: tetragonal; Space group: *P4/mmm*; Lattice parameters:  $a = b = 3.858267(6)$  Å and  $c = 15.43165(4)$  Å

Reliability factors:  $R_{\text{wp}} = 3.23\%$ ,  $R_{\text{p}} = 2.36\%$ ,  $R_{\text{B}} = 3.24\%$  and  $R_{\text{F}} = 3.32\%$ .

<sup>a</sup>  $g(X; s)$ : Occupancy factor of *X* atom at the *s* site.

<sup>b</sup>  $U_{\text{iso}}(X; s)$ : Isotropic atomic displacement parameter of *X* atom at the *s* site.

<sup>c</sup>  $U_{\text{eq}}$ : Equivalent isotropic atomic displacement parameter.

<sup>d</sup>  $U_{ij}$ : Anisotropic atomic displacement parameter.

<sup>e</sup> The following linear constraints were used in the refinement:  $U_{\text{iso}}(\text{Ti}; \text{Ti/Nb1}) = U_{\text{iso}}(\text{Nb}; \text{Ti/Nb1}) = U_{\text{iso}}(\text{Ti}; \text{Ti/Nb2}) = U_{\text{iso}}(\text{Nb}; \text{Ti/Nb2})$ .

<sup>f</sup> The occupancy factors of Cs, La, O1×2, O2, O3 and O4 were fixed to be 1 because the refined value was 1 within 3 times of the estimated deviation or higher than 1.

**Table S3.** Crystallographic parameters of CsLa<sub>2</sub>Ti<sub>2</sub>NbO<sub>9.948(5)</sub> which were refined using neutron-diffraction data at 673 K.

| Site <i>s</i> | Atom <i>X</i> ,<br>Oxidation number                                                          | Wyckoff<br>position                     | $g(X; s)^a$                             | <i>x</i>                                | <i>y</i>                                | <i>z</i>                                |                                         |
|---------------|----------------------------------------------------------------------------------------------|-----------------------------------------|-----------------------------------------|-----------------------------------------|-----------------------------------------|-----------------------------------------|-----------------------------------------|
| Cs            | Cs +1                                                                                        | 1 <i>d</i>                              | 1                                       | 1/2                                     | 1/2                                     | 1/2                                     |                                         |
| La            | La +3                                                                                        | 2 <i>h</i>                              | 1                                       | 1/2                                     | 1/2                                     | 0.14020(4)                              |                                         |
| Ti/Nb1        | Ti<br>Nb                                                                                     | + 4.02                                  | 1 <i>a</i>                              | 0.9796(11)                              | 0                                       | 0                                       | 0                                       |
|               |                                                                                              |                                         |                                         | 0.0204(11)                              |                                         |                                         |                                         |
| Ti/Nb2        | Ti<br>Nb                                                                                     | + 4.49                                  | 2 <i>g</i>                              | 0.5102(6)                               | 0                                       | 0                                       | 0.28071(2)                              |
|               |                                                                                              |                                         |                                         | 0.4898(6)                               |                                         |                                         |                                         |
| O1            | O -2                                                                                         | 4 <i>n</i>                              | 0.5                                     | 0.1056(2)                               | 1/2                                     | 0                                       |                                         |
| O2            | O -2                                                                                         | 2 <i>g</i>                              | 1                                       | 0                                       | 0                                       | 0.12407(5)                              |                                         |
| O3            | O -2                                                                                         | 4 <i>i</i>                              | 1                                       | 0                                       | 1/2                                     | 0.25005(4)                              |                                         |
| O4            | O -2                                                                                         | 2 <i>g</i>                              | 0.974(2)                                | 0                                       | 0                                       | 0.39403(7)                              |                                         |
| Site <i>s</i> | $U_{\text{iso}}^b$ or $U_{\text{eq}}^c$ (Å <sup>2</sup> )                                    | $U_{11}$ (Å <sup>2</sup> ) <sup>d</sup> | $U_{22}$ (Å <sup>2</sup> ) <sup>d</sup> | $U_{33}$ (Å <sup>2</sup> ) <sup>d</sup> | $U_{12}$ (Å <sup>2</sup> ) <sup>d</sup> | $U_{13}$ (Å <sup>2</sup> ) <sup>d</sup> | $U_{23}$ (Å <sup>2</sup> ) <sup>d</sup> |
| Cs            | $U_{\text{eq}} = 0.0306(5)$                                                                  | 0.0201(5)                               | 0.0201(5)                               | 0.0526(2)                               | 0                                       | 0                                       | 0                                       |
| La            | $U_{\text{eq}} = 0.0074(13)$                                                                 | 0.0033(2)                               | 0.0033(2)                               | 0.0156(5)                               | 0                                       | 0                                       | 0                                       |
| Ti/Nb1        | $U_{\text{iso}} = 0.0040(2)$                                                                 | -                                       | -                                       | -                                       | -                                       | -                                       | -                                       |
| Ti/Nb2        | $= U_{\text{iso}}(\text{Ti}; \text{Ti/Nb1})$<br>$= U_{\text{iso}}(\text{Nb}; \text{Ti/Nb1})$ | -                                       | -                                       | -                                       | -                                       | -                                       | -                                       |
| O1            | $U_{\text{iso}} = 0.0217(6)$                                                                 | -                                       | -                                       | -                                       | -                                       | -                                       | -                                       |
| O2            | $U_{\text{eq}} = 0.0210(3)$                                                                  | 0.0173(5)                               | 0.0173(5)                               | .0285(13)                               | 0                                       | 0                                       | 0                                       |
| O3            | $U_{\text{eq}} = 0.0157(2)$                                                                  | 0.0066(11)                              | 0.0064(9)                               | 0.0350(10)                              | 0                                       | 0                                       | 0                                       |
| O4            | $U_{\text{eq}} = 0.0160(8)$                                                                  | 0.0180(5)                               | 0.0180(5)                               | 0.0122(8)                               | 0                                       | 0                                       | 0                                       |

Crystal system: tetragonal; Space group: *P4/mmm*; Lattice parameters:  $a = b = 3.867334(5)$  Å and  $c = 15.46637(4)$  Å

Reliability factors:  $R_{\text{wp}} = 2.93\%$ ,  $R_{\text{p}} = 2.18\%$ ,  $R_{\text{B}} = 3.87\%$  and  $R_{\text{F}} = 3.86\%$ .

<sup>a</sup>  $g(X; s)$ : Occupancy factor of *X* atom at the *s* site.

<sup>b</sup>  $U_{\text{iso}}(X; s)$ : Isotropic atomic displacement parameter of *X* atom at the *s* site.

<sup>c</sup>  $U_{\text{eq}}$ : Equivalent isotropic atomic displacement parameter.

<sup>d</sup>  $U_{ij}$ : Anisotropic atomic displacement parameter.

<sup>e</sup> The following linear constraints were used in the refinement:  $U_{\text{iso}}(\text{Ti}; \text{Ti/Nb1}) = U_{\text{iso}}(\text{Nb}; \text{Ti/Nb1}) = U_{\text{iso}}(\text{Ti}; \text{Ti/Nb2}) = U_{\text{iso}}(\text{Nb}; \text{Ti/Nb2})$ .

<sup>f</sup> The occupancy factors of Cs, La, O1×2, O2, O3 and O4 were fixed to be 1 because the refined value was 1 within 3 times of the estimated deviation or higher than 1.

**Table S4.** Crystallographic parameters of CsLa<sub>2</sub>Ti<sub>2</sub>NbO<sub>9.940(5)</sub> which were refined using neutron-diffraction data at 873 K.

| Site <i>s</i> | Atom <i>X</i> ,<br>Oxidation number                       | Wyckoff<br>position                     | $g(X; s)^a$                             | <i>x</i>                                | <i>y</i>                                       | <i>z</i>                                       |                                                |
|---------------|-----------------------------------------------------------|-----------------------------------------|-----------------------------------------|-----------------------------------------|------------------------------------------------|------------------------------------------------|------------------------------------------------|
| Cs            | Cs +1                                                     | 1 <i>d</i>                              | 1                                       | 1/2                                     | 1/2                                            | 1/2                                            |                                                |
| La            | La +3                                                     | 2 <i>h</i>                              | 1                                       | 1/2                                     | 1/2                                            | 0.14063(5)                                     |                                                |
| Ti/Nb1        | Ti                                                        | + 4.02                                  | 1 <i>a</i>                              | 0.9845(11)                              | 0                                              | 0                                              | 0                                              |
|               | Nb                                                        |                                         |                                         | 0.0155(11)                              |                                                |                                                |                                                |
| Ti/Nb2        | Ti                                                        | + 4.49                                  | 2 <i>g</i>                              | 0.5077(6)                               | 0                                              | 0                                              | 0.2794(2)                                      |
|               | Nb                                                        |                                         |                                         | 0.4923(6)                               |                                                |                                                |                                                |
| O1            | O -2                                                      | 4 <i>n</i>                              | 0.5                                     | 0.10124(3)                              | 1/2                                            | 0                                              |                                                |
| O2            | O -2                                                      | 2 <i>g</i>                              | 1                                       | 0                                       | 0                                              | 0.12363(6)                                     |                                                |
| O3            | O -2                                                      | 4 <i>i</i>                              | 1                                       | 0                                       | 1/2                                            | 0.24996(4)                                     |                                                |
| O4            | O -2                                                      | 2 <i>g</i>                              | 0.970(3)                                | 0                                       | 0                                              | 0.39367(8)                                     |                                                |
| Site <i>s</i> | $U_{\text{iso}}^b$ or $U_{\text{eq}}^c$ (Å <sup>2</sup> ) | $U_{11}$ (Å <sup>2</sup> ) <sup>d</sup> | $U_{22}$ (Å <sup>2</sup> ) <sup>d</sup> | $U_{33}$ (Å <sup>2</sup> ) <sup>d</sup> | $U_{12}$ (Å <sup>2</sup> ) <sub><i>d</i></sub> | $U_{13}$ (Å <sup>2</sup> ) <sub><i>d</i></sub> | $U_{23}$ (Å <sup>2</sup> ) <sub><i>d</i></sub> |
| Cs            | $U_{\text{eq}} = 0.0438(6)$                               | 0.0286(7)                               | 0.0286(7)                               | 0.0744(2)                               | 0                                              | 0                                              | 0                                              |
| La            | $U_{\text{eq}} = 0.0129(2)$                               | 0.0062(2)                               | 0.0062(2)                               | 0.0264(6)                               | 0                                              | 0                                              | 0                                              |
| Ti/Nb1        | $U_{\text{iso}} = 0.0059(6)$                              | -                                       | -                                       | -                                       | -                                              | -                                              | -                                              |
| Ti/Nb2        | $= U_{\text{iso}}(\text{Ti}; \text{Ti/Nb1})$              | -                                       | -                                       | -                                       | -                                              | -                                              | -                                              |
|               | $= U_{\text{iso}}(\text{Nb}; \text{Ti/Nb1})$              | -                                       | -                                       | -                                       | -                                              | -                                              | -                                              |
| O1            | $U_{\text{iso}} = 0.0274(5)$                              | -                                       | -                                       | -                                       | -                                              | -                                              | -                                              |
| O2            | $U_{\text{eq}} = 0.0290(3)$                               | 0.0282(6)                               | 0.0282(6)                               | 0.0306(2)                               | 0                                              | 0                                              | 0                                              |
| O3            | $U_{\text{eq}} = 0.0187(2)$                               | 0.0154(4)                               | 0.0043(5)                               | 0.0364(11)                              | 0                                              | 0                                              | 0                                              |
| O4            | $U_{\text{eq}} = 0.0262(4)$                               | 0.0297(6)                               | 0.0297(6)                               | 0.0190(10)                              | 0                                              | 0                                              | 0                                              |

Crystal system: tetragonal; Space group: *P4/mmm*; Lattice parameters:  $a = b = 3.876526(5)$  Å and  $c = 15.50272(4)$  Å; Reliability factors:  $R_{\text{wp}} = 2.81\%$ ,  $R_{\text{p}} = 2.11\%$ ,  $R_{\text{B}} = 4.36\%$  and  $R_{\text{F}} = 4.20\%$ .

<sup>a</sup>  $g(X; s)$ : Occupancy factor of *X* atom at the *s* site. <sup>b</sup>  $U_{\text{iso}}(X; s)$ : Isotropic atomic displacement parameter of *X* atom at the *s* site. <sup>c</sup>  $U_{\text{eq}}$ : Equivalent isotropic atomic displacement parameter.

<sup>d</sup>  $U_{ij}$ : Anisotropic atomic displacement parameter. <sup>e</sup> The following linear constraints were used in the refinement:  $U_{\text{iso}}(\text{Ti}; \text{Ti/Nb1}) = U_{\text{iso}}(\text{Nb}; \text{Ti/Nb1}) = U_{\text{iso}}(\text{Ti}; \text{Ti/Nb2}) = U_{\text{iso}}(\text{Nb}; \text{Ti/Nb2})$ .

<sup>f</sup> The occupancy factors of Cs, La, O1×2, O2, O3 and O4 were fixed to be 1 because the refined value was 1 within 3 times of the estimated deviation or higher than 1.

**Table S5.** Crystallographic parameters of CsLa<sub>2</sub>Ti<sub>2</sub>NbO<sub>10</sub> which were refined using synchrotron X-ray powder diffraction data at 297 K.

| Site <i>s</i> | Atom <i>X</i> | Oxidation number | Wyckoff position | $g(X; s)^a$ | <i>x</i>  | <i>y</i> | <i>z</i>     | $U_{\text{iso}}(X; s)^b$                |
|---------------|---------------|------------------|------------------|-------------|-----------|----------|--------------|-----------------------------------------|
| Cs            | Cs            | +1               | 1 <i>d</i>       | 1           | 1/2       | 1/2      | 1/2          | 0.02796(13)                             |
| La            | La            | +3               | 2 <i>h</i>       | 1           | 1/2       | 1/2      | 0.141986(13) | 0.00601(6)                              |
| Ti/Nb<br>1    | Ti            | + 4.0            | 1 <i>a</i>       | 1           | 0         | 0        | 0            | 0.0185(3)                               |
|               | Nb            |                  |                  | 0           |           |          |              |                                         |
| Ti/Nb<br>2    | Ti            | + 4.5            | 2 <i>g</i>       | 0.5         | 0         | 0        | 0.28053(3)   | 0.01852(14)                             |
|               | Nb            |                  |                  | 0.5         |           |          |              |                                         |
| O1            | O             | -2               | 4 <i>n</i>       | 0.5         | 0.0938(7) | 1/2      | 0            | 0.0127(7)                               |
| O2            | O             | -2               | 2 <i>g</i>       | 1           | 0         | 0        | 0.12544(9)   | = $U_{\text{iso}}(\text{O}; \text{O1})$ |
| O3            | O             | -2               | 4 <i>i</i>       | 1           | 0         | 1/2      | 0.22754(7)   | = $U_{\text{iso}}(\text{O}; \text{O1})$ |
| O4            | O             | -2               | 2 <i>g</i>       | 1           | 0         | 0        | 0.381972(11) | = $U_{\text{iso}}(\text{O}; \text{O1})$ |

Crystal system: tetragonal; Space group: *P4/mmm*;

Lattice parameters:  $a = b = 3.850752(3)$  Å and  $c = 15.401752(22)$  Å;

Reliability factors:  $R_{\text{wp}} = 8.48\%$ ,  $R_{\text{p}} = 5.15\%$ ,  $R_{\text{B}} = 8.87\%$  and  $R_{\text{F}} = 6.22\%$ .

<sup>a</sup>  $g(X; s)$ : Occupancy factor of *X* atom at the *s* site.

<sup>b</sup>  $U_{\text{iso}}(X; s)$ : Isotropic atomic displacement parameter of *X* atom at the *s* site.

<sup>c</sup> The following linear constraints were used in the refinement:  $U_{\text{iso}}(\text{Ti}; \text{Ti/Nb1}) = U_{\text{iso}}(\text{Nb}; \text{Ti/Nb1})$ ;  $U_{\text{iso}}(\text{Ti}; \text{Ti/Nb2}) = U_{\text{iso}}(\text{Nb}; \text{Ti/Nb2})$ ;  $U_{\text{iso}}(\text{O}; \text{O1}) = U_{\text{iso}}(\text{O}; \text{O2}) = U_{\text{iso}}(\text{O}; \text{O3}) = U_{\text{iso}}(\text{O}; \text{O4})$ ;  $g(\text{O}; \text{O1}) \times 0.5 = g(\text{O}; \text{O2}) = g(\text{O}; \text{O3}) = g(\text{O}; \text{O4})$ .

<sup>d</sup> The occupancy factors of Cs, La, O1×2, O2, O3 and O4 were fixed to be 1 because the refined value was 1 within 3 times of the estimated deviation or higher than 1, the occupancy factors of Ti and Nb were fixed.

**Table S6.** Crystallographic parameters of CsLa<sub>2</sub>Ti<sub>2</sub>NbO<sub>10</sub> which were refined using synchrotron X-ray powder diffraction data at 473 K.

| Site <i>s</i> | Atom <i>X</i> | Oxidation number | Wyckoff position | $g(X; s)^a$ | <i>x</i>  | <i>y</i> | <i>z</i>     | $U_{\text{iso}}(X; s)^b$                |
|---------------|---------------|------------------|------------------|-------------|-----------|----------|--------------|-----------------------------------------|
| Cs            | Cs            | +1               | 1 <i>d</i>       | 1           | 1/2       | 1/2      | 1/2          | 0.04202(14)                             |
| La            | La            | +3               | 2 <i>h</i>       | 1           | 1/2       | 1/2      | 0.141888(13) | 0.01008(6)                              |
| Ti/Nb<br>1    | Ti            | + 4.0            | 1 <i>a</i>       | 1           | 0         | 0        | 0            | 0.00836(3)                              |
|               | Nb            |                  |                  | 0           |           |          |              |                                         |
| Ti/Nb<br>2    | Ti            | + 4.5            | 2 <i>g</i>       | 0.5         | 0         | 0        | 0.28025(3)   | 0.02471(15)                             |
|               | Nb            |                  |                  | 0.5         |           |          |              |                                         |
| O1            | O             | -2               | 4 <i>n</i>       | 0.5         | 0.0821(6) | 1/2      | 0            | 0.0238(2)                               |
| O2            | O             | -2               | 2 <i>g</i>       | 1           | 0         | 0        | 0.12268(9)   | = $U_{\text{iso}}(\text{O}; \text{O1})$ |
| O3            | O             | -2               | 4 <i>i</i>       | 1           | 0         | 1/2      | 0.22759(6)   | = $U_{\text{iso}}(\text{O}; \text{O1})$ |
| O4            | O             | -2               | 2 <i>g</i>       | 1           | 0         | 0        | 0.384138(11) | = $U_{\text{iso}}(\text{O}; \text{O1})$ |

Crystal system: tetragonal; Space group: *P4/mmm*;

Lattice parameters:  $a = b = 3.857901(3)$  Å and  $c = 15.428681(26)$  Å;

Reliability factors:  $R_{\text{wp}} = 7.69\%$ ,  $R_{\text{p}} = 4.69\%$ ,  $R_{\text{B}} = 9.02\%$  and  $R_{\text{F}} = 6.28\%$ .

<sup>a</sup>  $g(X; s)$ : Occupancy factor of *X* atom at the *s* site.

<sup>b</sup>  $U_{\text{iso}}(X; s)$ : Isotropic atomic displacement parameter of *X* atom at the *s* site.

<sup>c</sup> The following linear constraints were used in the refinement:  $U_{\text{iso}}(\text{Ti}; \text{Ti/Nb1}) = U_{\text{iso}}(\text{Nb}; \text{Ti/Nb1})$ ;  $U_{\text{iso}}(\text{Ti}; \text{Ti/Nb2}) = U_{\text{iso}}(\text{Nb}; \text{Ti/Nb2})$ ;  $U_{\text{iso}}(\text{O}; \text{O1}) = U_{\text{iso}}(\text{O}; \text{O2}) = U_{\text{iso}}(\text{O}; \text{O3}) = U_{\text{iso}}(\text{O}; \text{O4})$ ;  $g(\text{O}; \text{O1}) \times 0.5 = g(\text{O}; \text{O2}) = g(\text{O}; \text{O3}) = g(\text{O}; \text{O4})$ .

<sup>d</sup> The occupancy factors of Cs, La, O1×2, O2, O3 and O4 were fixed to be 1 because the refined value was 1 within 3 times of the estimated deviation or higher than 1, the occupancy factors of Ti and Nb were fixed.



**Table S7.** Crystallographic parameters of CsLa<sub>2</sub>Ti<sub>2</sub>NbO<sub>10</sub> which were refined using synchrotron X-ray powder diffraction data at 673 K.

| Site <i>s</i> | Atom <i>X</i> | Oxidation number | Wyckoff position | $g(X; s)^a$ | <i>x</i>  | <i>y</i> | <i>z</i>     | $U_{\text{iso}}(X; s)^b$                |
|---------------|---------------|------------------|------------------|-------------|-----------|----------|--------------|-----------------------------------------|
| Cs            | Cs            | +1               | 1 <i>d</i>       | 1           | 1/2       | 1/2      | 1/2          | 0.05782(15)                             |
| La            | La            | +3               | 2 <i>h</i>       | 1           | 1/2       | 1/2      | 0.142156(14) | 0.01596(6)                              |
| Ti/Nb1        | Ti            | + 4.0            | 1 <i>a</i>       | 1           | 0         | 0        | 0            | 0.0162(3)                               |
|               | Nb            |                  |                  | 0           |           |          |              |                                         |
| Ti/Nb2        | Ti            | + 4.5            | 2 <i>g</i>       | 0.5         | 0         | 0        | 0.27976(3)   | 0.02983(16)                             |
|               | Nb            |                  |                  | 0.5         |           |          |              |                                         |
| O1            | O             | -2               | 4 <i>n</i>       | 0.5         | 0.0752(7) | 1/2      | 0            | 0.0354(3)                               |
| O2            | O             | -2               | 2 <i>g</i>       | 1           | 0         | 0        | 0.12345(9)   | = $U_{\text{iso}}(\text{O}; \text{O1})$ |
| O3            | O             | -2               | 4 <i>i</i>       | 1           | 0         | 1/2      | 0.22614(6)   | = $U_{\text{iso}}(\text{O}; \text{O1})$ |
| O4            | O             | -2               | 2 <i>g</i>       | 1           | 0         | 0        | 0.381114(12) | = $U_{\text{iso}}(\text{O}; \text{O1})$ |

Crystal system: tetragonal; Space group: *P4/mmm*;

Lattice parameters:  $a = b = 3.867959(4)$  Å and  $c = 15.5465635(27)$  Å;

Reliability factors:  $R_{\text{wp}} = 7.50\%$ ,  $R_{\text{p}} = 4.55\%$ ,  $R_{\text{B}} = 9.38\%$  and  $R_{\text{F}} = 6.69\%$ .

<sup>a</sup>  $g(X; s)$ : Occupancy factor of *X* atom at the *s* site.

<sup>b</sup>  $U_{\text{iso}}(X; s)$ : Isotropic atomic displacement parameter of *X* atom at the *s* site.

<sup>c</sup> The following linear constraints were used in the refinement:  $U_{\text{iso}}(\text{Ti}; \text{Ti/Nb1}) = U_{\text{iso}}(\text{Nb}; \text{Ti/Nb1})$ ;  $U_{\text{iso}}(\text{Ti}; \text{Ti/Nb2}) = U_{\text{iso}}(\text{Nb}; \text{Ti/Nb2})$ ;  $U_{\text{iso}}(\text{O}; \text{O1}) = U_{\text{iso}}(\text{O}; \text{O2}) = U_{\text{iso}}(\text{O}; \text{O3}) = U_{\text{iso}}(\text{O}; \text{O4})$ ;  $g(\text{O}; \text{O1}) \times 0.5 = g(\text{O}; \text{O2}) = g(\text{O}; \text{O3}) = g(\text{O}; \text{O4})$ .

<sup>d</sup> The occupancy factors of Cs, La, O1×2, O2, O3 and O4 were fixed to be 1 because the refined value was 1 within 3 times of the estimated deviation or higher than 1, the occupancy factors of Ti and Nb were fixed.

**Table S8.** Crystallographic parameters of CsLa<sub>2</sub>Ti<sub>2</sub>NbO<sub>10</sub> which were refined using synchrotron X-ray powder diffraction data at 873 K.

| Site <i>s</i> | Atom <i>X</i> | Oxidation number | Wyckoff position | $g(X; s)^a$ | <i>x</i>  | <i>y</i> | <i>z</i>     | $U_{\text{iso}}(X; s)^b$                |
|---------------|---------------|------------------|------------------|-------------|-----------|----------|--------------|-----------------------------------------|
| Cs            | Cs            | +1               | 1 <i>d</i>       | 1           | 1/2       | 1/2      | 1/2          | 0.07944(17)                             |
| La            | La            | +3               | 2 <i>h</i>       | 1           | 1/2       | 1/2      | 0.141998(14) | 0.02443(6)                              |
| Ti/Nb<br>1    | Ti            | + 4.0            | 1 <i>a</i>       | 1           | 0         | 0        | 0            | 0.0180(3)                               |
|               | Nb            |                  |                  | 0           |           |          |              |                                         |
| Ti/Nb<br>2    | Ti            | + 4.5            | 2 <i>g</i>       | 0.5         | 0         | 0        | 0.27949(3)   | 0.03765(17)                             |
|               | Nb            |                  |                  | 0.5         |           |          |              |                                         |
| O1            | O             | -2               | 4 <i>n</i>       | 0.5         | 0.0643(8) | 1/2      | 0            | 0.0425(3)                               |
| O2            | O             | -2               | 2 <i>g</i>       | 1           | 0         | 0        | 0.12248(9)   | = $U_{\text{iso}}(\text{O}; \text{O1})$ |
| O3            | O             | -2               | 4 <i>i</i>       | 1           | 0         | 1/2      | 0.22676(7)   | = $U_{\text{iso}}(\text{O}; \text{O1})$ |
| O4            | O             | -2               | 2 <i>g</i>       | 1           | 0         | 0        | 0.38925(12)  | = $U_{\text{iso}}(\text{O}; \text{O1})$ |

Crystal system: tetragonal; Space group: *P4/mmm*;

Lattice parameters:  $a = b = 3.876614(4)$  Å and  $c = 15.501699(26)$  Å;

Reliability factors:  $R_{\text{wp}} = 7.51\%$ ,  $R_{\text{p}} = 4.74\%$ ,  $R_{\text{B}} = 10.29\%$  and  $R_{\text{F}} = 8.10\%$ .

<sup>a</sup>  $g(X; s)$ : Occupancy factor of *X* atom at the *s* site.

<sup>b</sup>  $U_{\text{iso}}(X; s)$ : Isotropic atomic displacement parameter of *X* atom at the *s* site.

<sup>c</sup> The following linear constraints were used in the refinement:  $U_{\text{iso}}(\text{Ti}; \text{Ti/Nb1}) = U_{\text{iso}}(\text{Nb}; \text{Ti/Nb1})$ ;  $U_{\text{iso}}(\text{Ti}; \text{Ti/Nb2}) = U_{\text{iso}}(\text{Nb}; \text{Ti/Nb2})$ ;  $U_{\text{iso}}(\text{O}; \text{O1}) = U_{\text{iso}}(\text{O}; \text{O2}) = U_{\text{iso}}(\text{O}; \text{O3}) = U_{\text{iso}}(\text{O}; \text{O4})$ ;  $g(\text{O}; \text{O1}) \times 0.5 = g(\text{O}; \text{O2}) = g(\text{O}; \text{O3}) = g(\text{O}; \text{O4})$ .

<sup>d</sup> The occupancy factors of Cs, La, O1×2, O2, O3 and O4 were fixed to be 1 because the refined value was 1 within 3 times of the estimated deviation or higher than 1, the occupancy factors of Ti and Nb were fixed.

**Table S9.** Crystallographic parameters of CsLa<sub>2</sub>Ti<sub>2</sub>NbO<sub>10</sub> which were refined using synchrotron X-ray powder diffraction data at 1073 K.

| Site <i>s</i> | Atom <i>X</i> | Oxidation number | Wyckoff position | $g(X; s)^a$ | <i>x</i>  | <i>y</i> | <i>z</i>     | $U_{\text{iso}}(X; s)^b$                |
|---------------|---------------|------------------|------------------|-------------|-----------|----------|--------------|-----------------------------------------|
| Cs            | Cs            | +1               | 1 <i>d</i>       | 1           | 1/2       | 1/2      | 1/2          | 0.09446(19)                             |
| La            | La            | +3               | 2 <i>h</i>       | 1           | 1/2       | 1/2      | 0.142078(15) | 0.02741(6)                              |
| Ti/Nb<br>1    | Ti            | + 4.0            | 1 <i>a</i>       | 1           | 0         | 0        | 0            | 0.0222(3)                               |
|               | Nb            |                  |                  | 0           |           |          |              |                                         |
| Ti/Nb<br>2    | Ti            | + 4.5            | 2 <i>g</i>       | 0.5         | 0         | 0        | 0.27904(3)   | 0.04343(18)                             |
|               | Nb            |                  |                  | 0.5         |           |          |              |                                         |
| O1            | O             | -2               | 4 <i>n</i>       | 0.5         | 0.0549(9) | 1/2      | 0            | 0.0486(3)                               |
| O2            | O             | -2               | 2 <i>g</i>       | 1           | 0         | 0        | 0.12152(9)   | = $U_{\text{iso}}(\text{O}; \text{O1})$ |
| O3            | O             | -2               | 4 <i>i</i>       | 1           | 0         | 1/2      | 0.22379(7)   | = $U_{\text{iso}}(\text{O}; \text{O1})$ |
| O4            | O             | -2               | 2 <i>g</i>       | 1           | 0         | 0        | 0.378359(12) | = $U_{\text{iso}}(\text{O}; \text{O1})$ |

Crystal system: tetragonal; Space group: *P4/mmm*;

Lattice parameters:  $a = b = 3.886112(4)$  Å and  $c = 15.542047(28)$  Å;

Reliability factors:  $R_{\text{wp}} = 7.97\%$ ,  $R_{\text{p}} = 5.01\%$ ,  $R_{\text{B}} = 10.9\%$  and  $R_{\text{F}} = 9.17\%$ .

<sup>a</sup>  $g(X; s)$ : Occupancy factor of *X* atom at the *s* site.

<sup>b</sup>  $U_{\text{iso}}(X; s)$ : Isotropic atomic displacement parameter of *X* atom at the *s* site.

<sup>c</sup> The following linear constraints were used in the refinement:  $U_{\text{iso}}(\text{Ti}; \text{Ti/Nb1}) = U_{\text{iso}}(\text{Nb}; \text{Ti/Nb1})$ ;  $U_{\text{iso}}(\text{Ti}; \text{Ti/Nb2}) = U_{\text{iso}}(\text{Nb}; \text{Ti/Nb2})$ ;  $U_{\text{iso}}(\text{O}; \text{O1}) = U_{\text{iso}}(\text{O}; \text{O2}) = U_{\text{iso}}(\text{O}; \text{O3}) = U_{\text{iso}}(\text{O}; \text{O4})$ ;  $g(\text{O}; \text{O1}) \times 0.5 = g(\text{O}; \text{O2}) = g(\text{O}; \text{O3}) = g(\text{O}; \text{O4})$ .

<sup>d</sup> The occupancy factors of Cs, La, O1×2, O2, O3 and O4 were fixed to be 1 because the refined value was 1 within 3 times of the estimated deviation or higher than 1, the occupancy factors of Ti and Nb were fixed.
